# Supplementary material
Source: publisher figshare collection journal article supplement (https://karger.figshare.com/ndownloader/files/24090095)
Supplement: Supplementary file 1 [file 24090095]

**Supplementary table 1: Risk factors for a perioperative blood transfusion**

|  | **univariable** | | | **multivariable** | | |
| --- | --- | --- | --- | --- | --- | --- |
|  | **OR** | **95%-CI** | **p**d | **OR** | **95 %-CI** | **p**d |
| **Age (> 65 vs. ≤ 65 y.)** | 2.80 | 1.77 – 4.45 | < 0.001 | 1.55 | 0.85 – 2.81 | 0.150 |
| **Obesity (BMI ≥ 30 vs. < 30)** | 0.87 | 0.52 – 1.46 | 0.599 | 0.89 | 0.47 – 1.69 | 0.719 |
| **Diabetes mellitus** | 2.28 | 1.40 – 3.72 | 0.001 | 1.30 | 0.70 – 2.41 | 0.415 |
| **Arterial hypertension** | 3.37 | 1.80 – 6.32 | < 0.001 | 1.77 | 0.85 – 3.65 | 0.126 |
| **ECOG (≥ 1 vs. 0)** | 3.83 | 2.10 – 7.00 | < 0.001 | 2.30 | 1.10 – 4.77 | 0.026 |
| **Operation (RN vs. PN)** | 1.45 | 0.94 – 2.23 | 0.094 | 1.69 | 0.90 – 3.17 | 0.105 |
| **T-Stadium (T3-4 vs. T1-2)** | 2.49 | 1.58 – 3.93 | < 0.001 | 2.01 | 1.06 – 3.83 | 0.034 |
| **Anemia** | 8.31 | 5.24 – 13.17 | < 0.001 | 5.63 | 3.23 – 9.81 | < 0.001 |
| **CKD (3-5 vs. 1-2)** | 4.94 | 3.16 – 7.72 | < 0.001 | 2.55 | 1.46 – 4.45 | 0.001 |
| **M-Status (+ vs. 0)** | 2.79 | 1.37 – 5.41 | 0.003 | 2.58 | 1.04 – 6.38 | 0.041 |
| **N-Status (+ vs. 0)** | 2.60 | 1.23 – 5.48 | 0.009 | 1.72 | 0.63 – 4.74 | 0.293 |

d = Logistic Regression; Abbreviations: BMI = body mass index, CKD = chronic kidney disease
